# Supplementary material for: Towards a framework for evaluating and reporting Hansen solubility parameters: applications to particle dispersions
Source: Royal Society of Chemistry journal article supplement (doi:10.1039/d1na00405k), 2021-01-01
Supplement: d1na00405k1.pdf [file d1na00405k1.pdf]

## Supplementary material

### Towards a framework for evaluating and reporting Hansen solubility parameters: Applications to particle dispersions

Shalmali Bapat <sup>a</sup>, Stefan O. Kilian <sup>b</sup>, Hartmut Wiggers <sup>b,c</sup>, and Doris Segets <sup>a,c\*</sup>

<sup>a</sup> Process Technology for Electrochemical Functional Materials, Institute for Combustion and Gas Dynamics – Reactive Fluids (IVG-RF), University of Duisburg-Essen (UDE), Duisburg, Germany

<sup>b</sup> Institute for Combustion and Gas Dynamics – Reactive Fluids (IVG-RF), University of Duisburg-Essen (UDE), Duisburg, Germany.

<sup>c</sup> Center for Nanointegration Duisburg-Essen (CENIDE), Duisburg, Germany

#### Materials & Methods

##### Synthesis of SiN<sub>x</sub>

A tubular hot-wall reactor was used to synthesize SiN<sub>x</sub> nanoparticles.<sup>1</sup> The reactor consists of a ceramic reaction tube, a furnace, a gas feeding system, a filter, and an exhaust gas burning system. The precursor gases were fed through a gas nozzle that is supported by a co-axial sheath gas flow that reduces the chemical vapor deposition (CVD) growth on the inner walls of the reaction tube and the recirculation of the precursor gases. The gas mixture was then pyrolysed in the 80 cm long hot zone of the reaction tube. This hot zone was created by a resistively heated furnace. The reaction tube had an inner diameter of 60 mm and a length of 2 m. After pyrolysis, the nanoparticle-laden waste gas was filtered through a porous membrane. The waste gas was burned, and the nanoparticles were harvested from the filter, either in ambient or inert atmosphere. After collection of the nanoparticles, a sieving step was added to exclude unwanted CVD-particles and aggregates bigger than 63 μm (mesh size).

Two precursor gases were used, ammonia (N50, Air Liquide) and 10 % monosilane in argon (UHP Silane, Argon N50, Air Liquide). The sheath gas was nitrogen. Process parameters used for the synthesis of SiN<sub>x</sub> nanoparticles of this work were: 20 slm of nitrogen sheath gas and 2.6 slm of precursor gas mixture, resulting in a total gas flow of

22.6 slm. The molar precursor ratio for the gas mixture  $r = \frac{\dot{v}(\text{NH}_3)}{\dot{v}(\text{SiH}_4)}$  was 3. The synthesis temperature was 900 °C and the pressure inside the reactor was kept constant at 1 bar.

##### Probe liquids

All probe liquids (PLs) used in this study including their abbreviations are listed in Table S1. As described in the previous work of Süß et al.<sup>2</sup> and Stauch et al.,<sup>3</sup> liquids were selected in such way that their HSP coordinates span a wide range of the 3D Hansen space.

Table S1: List of PLs used to study the dispersion behavior of SiN<sub>x</sub> nanoparticles along with their HSP values.

| Liquids                | Abbreviation | $\delta D/MPa^{0.5}$ | $\delta P/MPa^{0.5}$ | $\delta H/MPa^{0.5}$ |
|------------------------|--------------|----------------------|----------------------|----------------------|
| Acetone                | Ace          | 15.5                 | 10.4                 | 7                    |
| Diacetone alcohol      | DAA          | 15.8                 | 8.2                  | 10.8                 |
| Ethanol                | EtOH         | 15.8                 | 8.8                  | 19.4                 |
| Ethyl acetate          | EA           | 15.8                 | 5.3                  | 7.2                  |
| Hexane                 | Hex          | 14.9                 | 0                    | 0                    |
| 2-Propanol             | IPA          | 15.8                 | 6.1                  | 16.4                 |
| Methanol               | MeOH         | 14.7                 | 12.3                 | 22.3                 |
| N-Methyl-2-pyrrolidone | NMP          | 18                   | 12.3                 | 7.2                  |
| Propylene carbonate    | PC           | 20                   | 18                   | 4.1                  |
| Tetrahydrofuran        | THF          | 16.8                 | 5.7                  | 8                    |
| Toluene                | Tol          | 18                   | 1.4                  | 2                    |
| Water                  | -            | 15.5                 | 16                   | 42.2                 |

### Dispersion procedure

SiN<sub>x</sub> dispersions (0.0083 wt.%) were prepared by dispersing the powder in a defined set of PLs (listed in Table S1). The suspensions were introduced into an ultrasonic bath (Elmasonic S30, 37kHz, 80 W, Elma Schmidbauer GmbH) for 30 minutes at room temperature, for adequate mixing. The water inside the bath was replaced every 10 minutes to avoid overheating.

### Scanning electron microscopy imaging

Scanning electron microscopy (SEM) was performed using a JEOL JSM-7500F microscope. The acceleration voltage was set to 5 kV. Samples of SiN<sub>x</sub> dispersed in acetone, diacetone alcohol, ethanol, N-Methyl-2-pyrrolidone, toluene and water were prepared according to the dispersion procedure described above. Then, 1  $\mu$ l of dispersion was dropped on a cleaned silicon wafer. Samples were dried overnight under ambient conditions.

### Analytical centrifugation analysis

Analytical centrifugation (AC) measurements were performed with a LUMiSizer® 651 (LUM GmbH, Berlin, Germany). For a typical AC run, a blue-light wavelength of 410 nm was used. Polycarbonate and polyamide cells (LUM GmbH, Berlin, Germany) with an optical path length of 2 mm were used depending on their compatibility with liquids. The sample cells were filled with 300  $\mu$ l of the sample. The temperature was set to 7 °C for all measurements. This is in accordance with the recommendation made by Uttinger et al.<sup>4</sup> to avoid convective instabilities due to thermal gradients. Sample cells filled with the SiN<sub>x</sub> dispersions were inserted into the rotor immediately after the ultrasonication step. Centrifugation was performed with no delay at 1500 rpm corresponding to a relative centrifugal acceleration (RCA) of 327 at the cell bottom for 50 minutes.

### S score and stability trajectory

9-point moving averaged raw data for the transmission profiles was accessed from the AC software (SepView®). The raw data was manually copied into spreadsheet software and saved as comma-separated or "xlsx" file formats. Scientific libraries in Python language were used for calculating S scores and plotting stability trajectories. Numerical processing was performed with NumPy<sup>5</sup> and Pandas<sup>6</sup> and plotting was done using Matplotlib.<sup>7</sup>

The transmission profile ( $T_i$ ) was normalized by subtracting the corresponding mean of the profile  $T_i$  across radial position and dividing by the standard deviation  $\sigma_{T_i}$  of the profile resulting in a normalized profile ( $Z_i$ ). This step is also known as z-normalization and is repeated for each profile captured.

$$Z_i = \frac{T_i - \hat{T}_i}{\sigma_{T_i}} \quad (1)$$

Further, the median of each normalized profile is calculated.

$$\tilde{Z}_i = \text{median}(Z_i) \quad (2)$$

The median absolute deviation (MAD) is then calculated for each transmission profile, resulting in an S score  $\tilde{S}_i$  for each time point.

$$\tilde{S}_i = \text{median}(|Z_i - \tilde{Z}_i|) \quad (3)$$

Stability trajectories were obtained by plotting the calculated S scores versus time.

#### Calculation of Hansen parameters

HSP values were calculated using HSPiP (Hansen Solubility Parameters in Practice, 5th edition, version 5.3.06) software.

## Supplementary Results

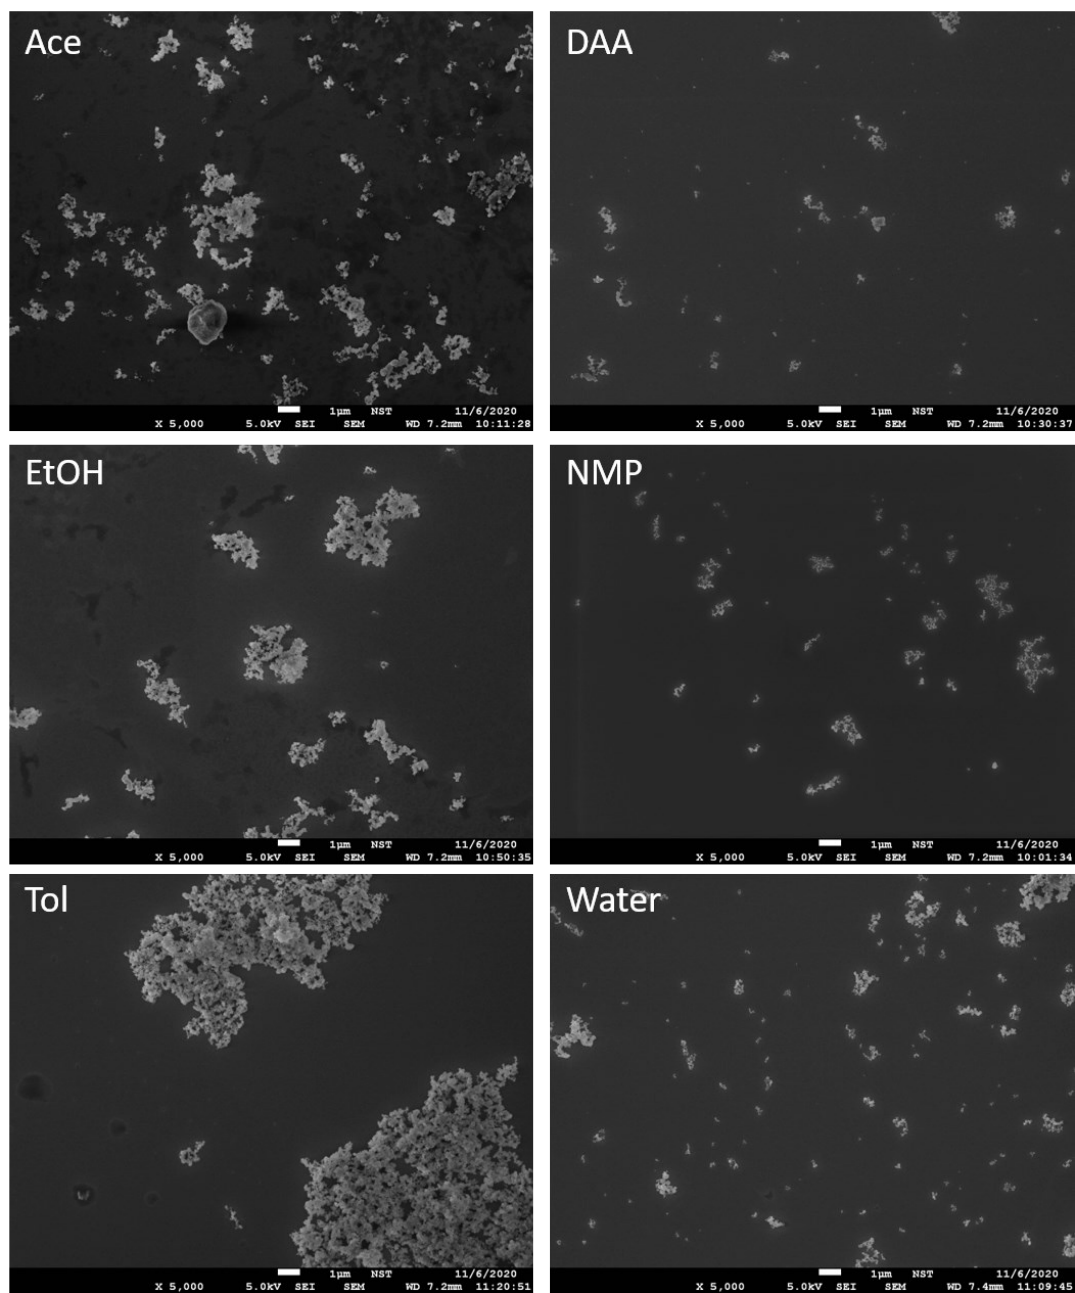

Figure S1: SEM micrographs of  $\text{SiN}_x$  dispersions (0.0083 wt. %) in acetone (Ace, upper left), diacetone alcohol (DAA; upper right), ethanol (EtOH, middle left), N-methyl-2-pyrrolidone (NMP, middle right), toluene (Tol, bottom left), and water (bottom right) at a magnification of 5 kx.

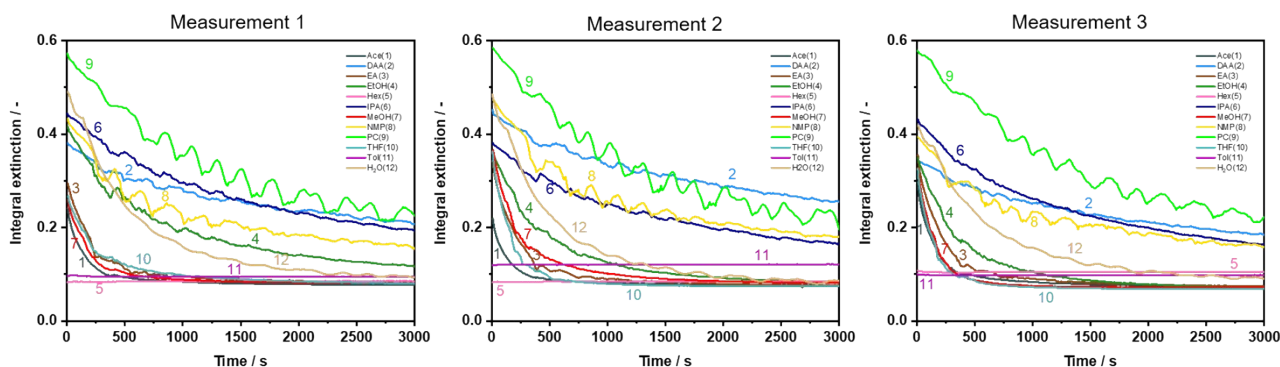

Figure S2: Integral extinction (IE) over time for the region of interest (ROI) of 10 mm under the sample filling level for SiN<sub>x</sub> particles dispersed in all twelve PLs. The plot shows IE curves for three independent AC measurements recorded over 50 minutes.

Supplementary Figure S2 depicts the change in integral extinction (IE) with time for SiN<sub>x</sub> particles dispersed in all twelve PLs used for this study.

A threshold IE value is required to evaluate the sedimentation times for different PLs, which can be used to evaluate the relative sedimentation times (RST). RST values are then used to order and rank the PLs as good or poor. The two major issues here are intersecting IE curves, and a wavy IE curve (for instance as seen for solvent PC). With the former, the selection of a threshold IE value becomes arbitrary, and with the latter, the IE curve intersects with the threshold IE at multiple time points. Both these aspects leave the user in perplexity, which eventually leads to multiple ranking possibilities based on the RST. Changes in RST order can directly affect the assignment of good or poor liquid for evaluation of HSP.

Moving on to deciding good or poor PLs, we now discuss to what extent it impacts the evaluated HSP values. Following the method described by Süß et al.<sup>2</sup>, solvents are incrementally considered as good and the results obtained are summarized in supplementary Table S2. A minimum HSP interaction distance is plotted with the number of liquids ranked as good in Figure S3. We see that the minimum is reached when all eleven liquids are considered as good. As a result, there is ambiguity, this time in the final HSP value to choose trust and report. Furthermore, what is not considered is the number of wrong in and wrong out PLs, i.e., outliers.

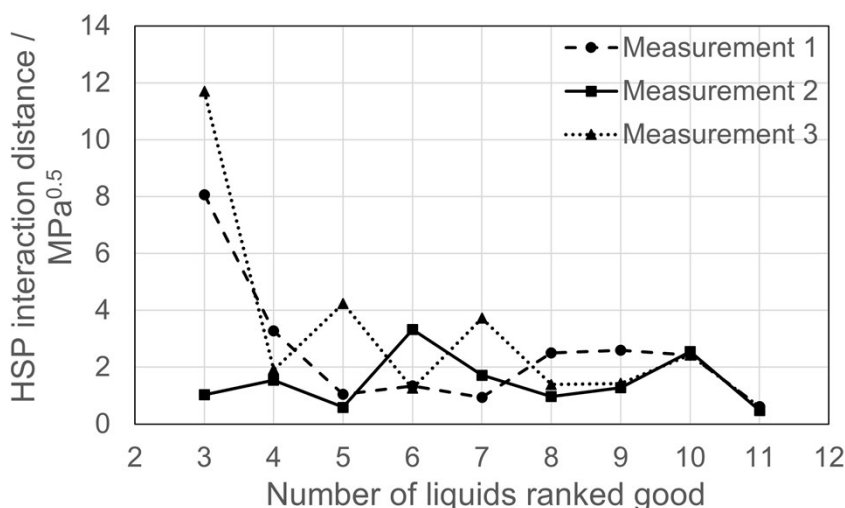

Figure S3: HSP interaction distance vs number of PLs ranked good for all three AC measurements.

Table S2: HSP interaction evaluation at IE = 0.25 for measurement 1 (top), measurement 2 (middle) and measurement 3 (bottom).

| Number of liquids ranked good | $\delta D/MPa^{0.5}$ | $\delta P/MPa^{0.5}$ | $\delta H/MPa^{0.5}$ | R   | HSP interaction distance | Poor liquids inside sphere | Good liquids outside sphere |
|-------------------------------|----------------------|----------------------|----------------------|-----|--------------------------|----------------------------|-----------------------------|
| 2                             | 19.0                 | 15.6                 | 6.8                  | 3.9 |                          | 1                          | 2                           |
| 3                             | 16.9                 | 9.5                  | 15.8                 | 3.9 | 8.1                      | 0                          | 2                           |
| 4                             | 16.3                 | 9.4                  | 14.3                 | 3.9 | 3.3                      | 0                          | 3                           |
| 5                             | 17.2                 | 11.0                 | 10.8                 | 3.9 | 1.0                      | 0                          | 5                           |
| 6                             | 17.0                 | 10.2                 | 9.8                  | 3.9 | 1.3                      | 0                          | 6                           |
| 7                             | 16.5                 | 9.1                  | 13.2                 | 3.9 | 0.9                      | 0                          | 6                           |
| 8                             | 16.2                 | 9.5                  | 14.3                 | 3.9 | 2.5                      | 0                          | 6                           |
| 9                             | 16.4                 | 8.7                  | 13.2                 | 3.9 | 2.6                      | 0                          | 8                           |
| 10                            | 16.5                 | 9.0                  | 10.8                 | 3.9 | 2.4                      | 0                          | 9                           |
| 11                            | 16.4                 | 9.0                  | 10.2                 | 3.9 | 0.6                      | 0                          | 9                           |

| Number of liquids ranked good | $\delta D/MPa^{0.5}$ | $\delta P/MPa^{0.5}$ | $\delta H/MPa^{0.5}$ | R   | HSP interaction distance | Poor liquids inside sphere | Good liquids outside sphere |
|-------------------------------|----------------------|----------------------|----------------------|-----|--------------------------|----------------------------|-----------------------------|
| 2                             | 16.7                 | 11.4                 | 10.0                 | 3.9 |                          | 1                          | 2                           |
| 3                             | 17.1                 | 11.3                 | 9.3                  | 3.9 | 1.0                      | 1                          | 2                           |
| 4                             | 17.3                 | 10.5                 | 10.4                 | 3.9 | 1.5                      | 0                          | 4                           |
| 5                             | 17.2                 | 11.0                 | 10.7                 | 3.9 | 0.6                      | 0                          | 5                           |
| 6                             | 16.4                 | 10.4                 | 13.6                 | 3.9 | 3.3                      | 0                          | 5                           |
| 7                             | 16.3                 | 9.8                  | 15.2                 | 3.9 | 1.7                      | 0                          | 6                           |
| 8                             | 16.2                 | 9.5                  | 14.3                 | 3.9 | 1.0                      | 0                          | 7                           |
| 9                             | 16.5                 | 8.8                  | 13.4                 | 3.9 | 1.3                      | 0                          | 8                           |
| 10                            | 16.5                 | 9.0                  | 10.8                 | 3.9 | 2.5                      | 0                          | 9                           |
| 11                            | 16.4                 | 8.9                  | 10.4                 | 3.9 | 0.5                      | 0                          | 10                          |

| Number of liquids ranked good | $\delta D/MPa^{0.5}$ | $\delta P/MPa^{0.5}$ | $\delta H/MPa^{0.5}$ | R   | HSP interaction distance | Poor liquids inside sphere | Good liquids outside sphere |
|-------------------------------|----------------------|----------------------|----------------------|-----|--------------------------|----------------------------|-----------------------------|
| 2                             | 19.0                 | 15.6                 | 6.8                  | 3.9 |                          | 1                          | 2                           |
| 3                             | 16.9                 | 9.5                  | 15.8                 | 3.9 | 11.7                     | 1                          | 3                           |
| 4                             | 16.3                 | 9.4                  | 14.3                 | 3.9 | 1.9                      | 0                          | 3                           |
| 5                             | 17.2                 | 11.0                 | 10.8                 | 3.9 | 4.2                      | 0                          | 5                           |
| 6                             | 17.0                 | 10.2                 | 9.8                  | 3.9 | 1.3                      | 0                          | 4                           |
| 7                             | 16.5                 | 9.1                  | 13.2                 | 3.9 | 3.7                      | 0                          | 6                           |
| 8                             | 16.2                 | 9.5                  | 14.3                 | 3.9 | 1.4                      | 0                          | 7                           |
| 9                             | 16.4                 | 8.7                  | 13.2                 | 3.9 | 1.4                      | 0                          | 8                           |
| 10                            | 16.5                 | 9.0                  | 10.8                 | 3.9 | 2.4                      | 0                          | 9                           |
| 11                            | 16.4                 | 9.0                  | 10.2                 | 3.9 | 0.6                      | 0                          | 9                           |

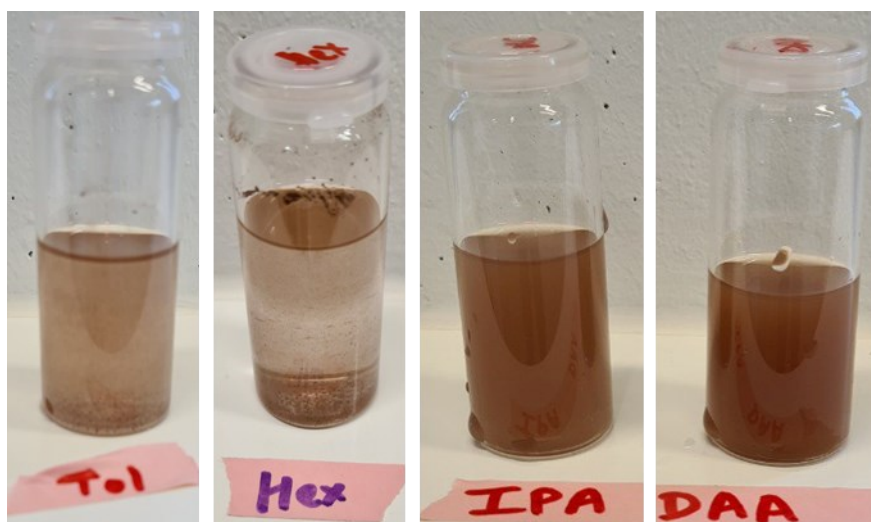

Figure S4: Photographs of vials filled with freshly prepared SiN<sub>x</sub> dispersions in Toluene (Tol), Hexane (Hex), 2-propanol (IPA) and Diacetone alcohol (DAA). The vials became transparent immediately after preparation in case of Tol and Hex indicating poor dispersibility of SiN<sub>x</sub> particles in these PLs.

Table S3: Possible scoring permutations for HSP evaluation.

| N liquids | No information<br>Q <sub>0</sub> | Known good liquids<br>Q <sub>m</sub> |        |        | Known poor liquids<br>Q <sub>i</sub> |        |        | Known good and poor liquids<br>Q <sub>lm</sub> |                 |                 |
|-----------|----------------------------------|--------------------------------------|--------|--------|--------------------------------------|--------|--------|------------------------------------------------|-----------------|-----------------|
|           |                                  | M = 1                                | M = 2  | M = 3  | L = 1                                | L = 2  | L = 3  | M = 1,<br>L = 1                                | M = 2,<br>L = 1 | M = 2,<br>L = 2 |
| 3         | 3                                | 2                                    | 1      | 0      | 1                                    | 0      |        | 1                                              | 1               |                 |
| 4         | 10                               | 6                                    | 3      | 1      | 4                                    | 1      | 0      | 3                                              | 2               | 1               |
| 5         | 25                               | 14                                   | 7      | 3      | 11                                   | 4      | 1      | 7                                              | 4               | 2               |
| 6         | 56                               | 30                                   | 15     | 7      | 26                                   | 11     | 4      | 15                                             | 8               | 4               |
| 7         | 119                              | 62                                   | 31     | 15     | 57                                   | 26     | 11     | 31                                             | 16              | 8               |
| 8         | 246                              | 126                                  | 63     | 31     | 120                                  | 57     | 26     | 63                                             | 32              | 16              |
| 9         | 501                              | 254                                  | 127    | 63     | 247                                  | 120    | 57     | 127                                            | 64              | 32              |
| 10        | 1012                             | 510                                  | 255    | 127    | 502                                  | 247    | 120    | 255                                            | 128             | 64              |
| 11        | 2035                             | 1022                                 | 511    | 255    | 1013                                 | 502    | 247    | 511                                            | 256             | 128             |
| 12        | 4082                             | 2046                                 | 1023   | 511    | 2036                                 | 1013   | 502    | 1023                                           | 512             | 256             |
| 13        | 8177                             | 4094                                 | 2047   | 1023   | 4083                                 | 2036   | 1013   | 2047                                           | 1024            | 512             |
| 14        | 16368                            | 8190                                 | 4095   | 2047   | 8178                                 | 4083   | 2036   | 4095                                           | 2048            | 1024            |
| 15        | 32751                            | 16382                                | 8191   | 4095   | 16369                                | 8178   | 4083   | 8191                                           | 4096            | 2048            |
| 16        | 65518                            | 32766                                | 16383  | 8191   | 32752                                | 16369  | 8178   | 16383                                          | 8192            | 4096            |
| 17        | 131053                           | 65534                                | 32767  | 16383  | 65519                                | 32752  | 16369  | 32767                                          | 16384           | 8192            |
| 18        | 262124                           | 131070                               | 65535  | 32767  | 131054                               | 65519  | 32752  | 65535                                          | 32768           | 16384           |
| 19        | 524267                           | 262142                               | 131071 | 65535  | 262125                               | 131054 | 65519  | 131071                                         | 65536           | 32768           |
| 20        | 1048554                          | 524286                               | 262143 | 131071 | 524268                               | 262125 | 131054 | 262143                                         | 131072          | 65536           |

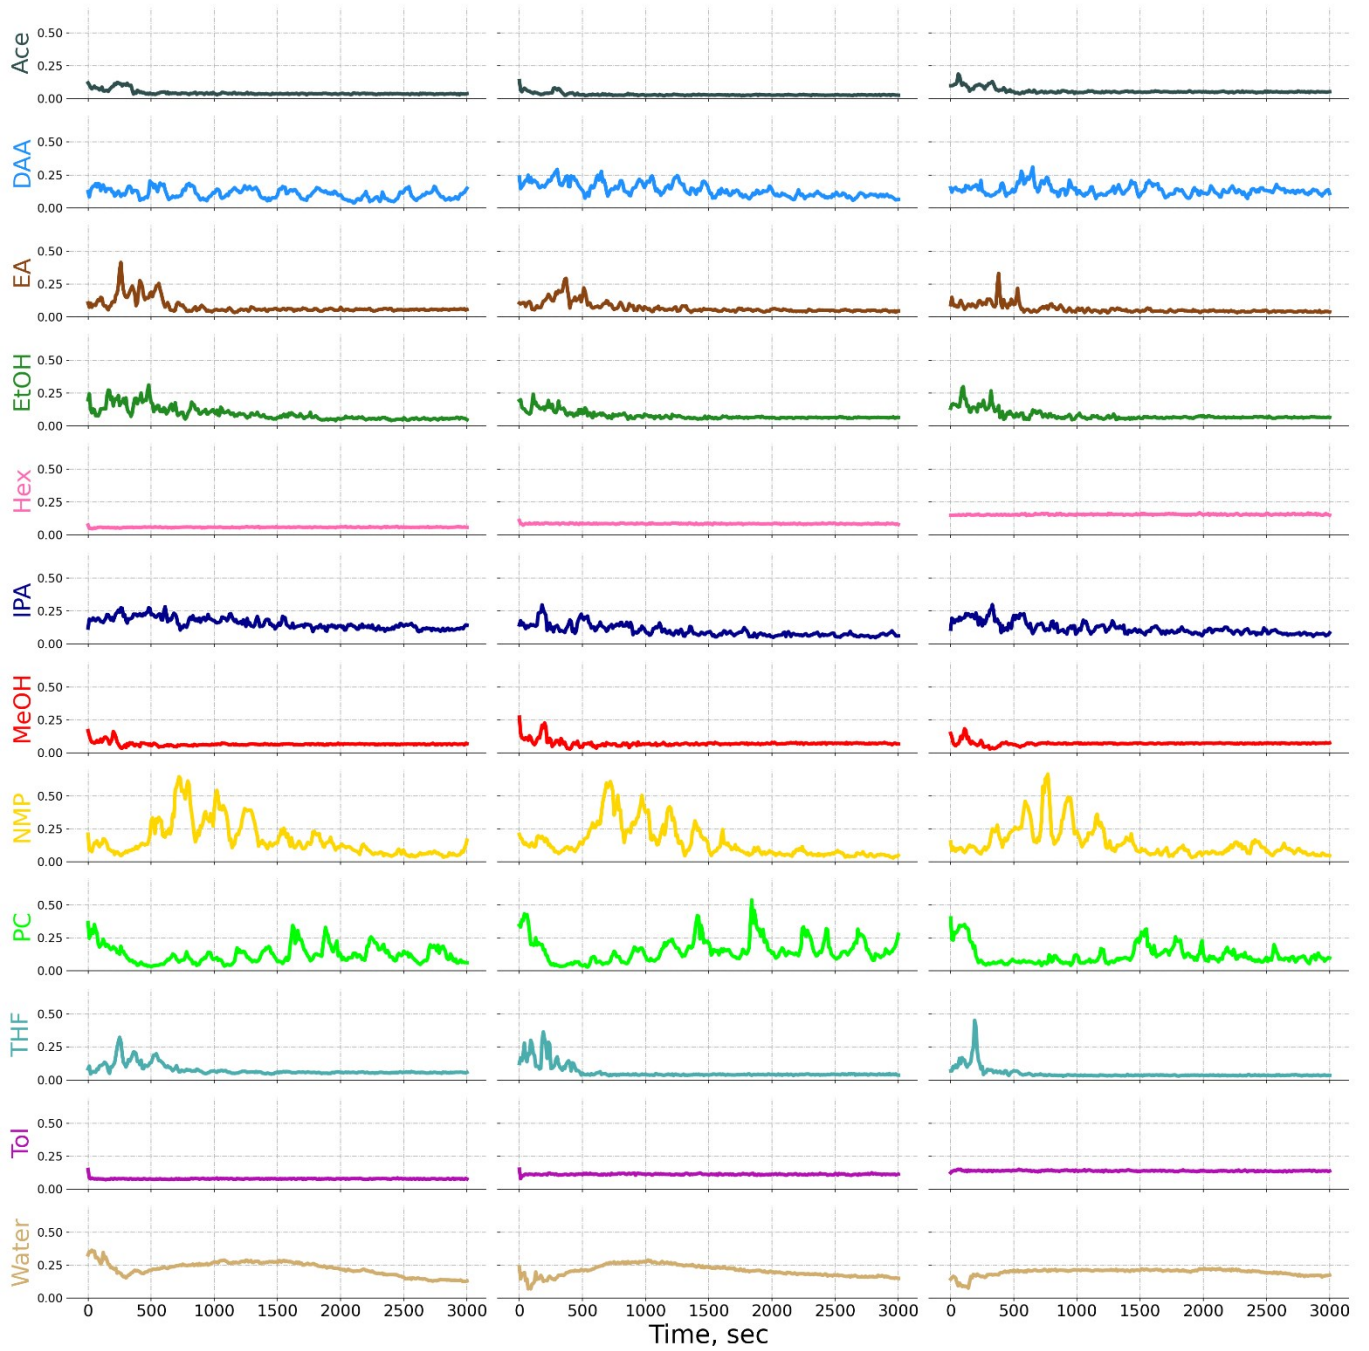

Figure S5: Stability trajectories of SiN<sub>x</sub> dispersions in all twelve PLs for three independent AC measurements.



## References

- 1 S. O. Kilian and H. Wiggers, Gas-phase Synthesis of Silicon-rich Silicon Nitride Nanoparticles for High Performance Lithium-Ion Batteries, *Part. Part. Syst. Charact.*, 2021, 2100007, 1–10.
- 2 S. Süß, T. Sobisch, W. Peukert, D. Lerche and D. Segets, Determination of Hansen parameters for particles: A standardized routine based on analytical centrifugation, *Adv. Powder Technol.*, 2018, 29, 1550–1561.
- 3 C. Stauch, S. Sebastian, R. Luxenhofer, B. P. Binks, D. Segets and K. Mandel, Quantifying Surface Properties of Silica Particles by Combining Hansen Parameters and Reichardt's Dye Indicator Data, *Part. Part. Syst. Charact.*, 2018, 35, 1–11.
- 4 M. J. Uttinger, S. Boldt, S. E. Wawra, T. D. Freiwald, C. Damm, J. Walter, D. Lerche and W. Peukert, New Prospects for Particle Characterization Using Analytical Centrifugation with Sector-Shaped Centerpieces, *Part. Part. Syst. Charact.*, 2020, 2000108.
- 5 C. R. Harris, K. J. Millman, S. J. van der Walt, R. Gommers, P. Virtanen, D. Cournapeau, E. Wieser, J. Taylor, S. Berg, N. J. Smith, R. Kern, M. Picus, S. Hoyer, M. H. van Kerkwijk, M. Brett, A. Haldane, J. F. del Río, M. Wiebe, P. Peterson, P. Gérard-Marchant, K. Sheppard, T. Reddy, W. Weckesser, H. Abbasi, C. Gohlke and T. E. Oliphant, Array programming with NumPy, *Nature*, 2020, 585, 357–362.
- 6 W. McKinney, Data structures for statistical computing in python, in *Proceedings of the 9th Python in Science Conference*, 2010, vol. 445, pp. 51–56.
- 7 J. D. Hunter, Matplotlib: A 2D graphics environment, *Comput. Sci. Eng.*, 2007, 9, 90–95.
